# Supplementary material
Source: HighWire-hosted journal article supplement (https://bmjopen.bmj.com/content/11/9/e044567)
Supplement: inline-supplementary-material-1 [file inline-supplementary-material-1.pdf]

**Medline search**

1. postpartum period/ or lactation/
2. postpartum period.mp.
3. Peripartum Period/
4. peripartum period.mp.
5. postpartum women.mp.
6. post partum women.mp.
7. (post natal or postnatal).tw.
8. (postpartum or post partum).tw.
9. (post pregnancy or postpregnancy).tw.
10. ((Post or after or follow\*) adj birth\*).tw.
11. ((Post or after or follow\*) adj labo?r).tw.
12. ((Post or after or follow\*) adj childbirth\*).tw.
13. ((Post or after or follow\*) adj pregnancy).tw.
14. ((Post or after or follow\*) adj parturition).tw.
15. ((Post or after or follow\*) adj delivery).tw.
16. (interpregnanc\* or inter pregnanc\* or (between adj pregnanc\*)).tw.
17. (interconception or inter conception or (between adj conception)).tw.
18. puerperium.tw.
19. or/1-18
20. exercise/ or cool-down exercise/ or gymnastics/ or muscle stretching exercises/ or physical conditioning, human/ or circuit-based exercise/ or high-intensity interval training/ or plyometric exercise/ or resistance training/ or running/ or jogging/ or swimming/ or walking/ or warm-up exercise/ or pronation/ or supination/
21. exercise.tw

22. exercise therapy/ or motion therapy, continuous passive/
23. motor activity/ or physical exertion/ or physical fitness/ or cardiorespiratory fitness/ or postural balance/
24. sports/ or athletic performance/ or baseball/ or basketball/ or bicycling/ or boxing/ or football/ or golf/ or gymnastics/ or hockey/ or martial arts/ or tai ji/ or mountaineering/ or racquet sports/ or tennis/ or return to sport/ or running/ or jogging/ or skating/ or snow sports/ or skiing/ or soccer/ or sports for persons with disabilities/ or "track and field"/ or volleyball/ or walking/ or water sports/ or swimming/ or diving/ or weight lifting/ or wrestling/ or youth sports/
25. sports medicine/ or sports nutritional sciences/
26. fitness.tw.
27. (activit\* and program\*).tw.
28. (locomotor and activit\*).tw.
29. (motor and activit\*).tw.
30. (structure\* and activit\*).tw.
31. training\*.tw.
32. (therap\* and exercis\*).tw.
33. physical\*.tw.
34. (activit\* or conditioning\* or effort\* or exert\*).tw.
35. 33 and 34
36. 20 or 21 or 22 or 23 or 24 or 25 or 26 or 27 or 28 or 29 or 30 or 31 or 32 or 35
37. randomized controlled trial'.pt.
38. (random\$ or placebo\$ or single blind\$ or double blind\$ or triple blind\$).mp.
39. (retraction of publication or retracted publication or controlled clinical trial).pt. or randomi?ed.tw. or randomly.tw.
40. controlled clinical trial.pt.
41. randomi?ed.tw.

42. randomly.tw.
43. or/37-42
44. exp animals/ not humans.sh.
45. (random sampl\$ or random digit\$ or random effect\$ or random survey or random regression).mp. not 'randomized controlled trial'.pt.
46. 43 not (44 or 45)
47. 19 and 36 and 46
